# Supplementary material
Source: PubMed Central journal article supplement (PMC7066691)
Supplement: ONCO-25-229-s001.pdf [file ONCO-25-229-s001.pdf]

Supplemental Table for:  
Medical Oncologists' Perspectives on how the Results of the IDEA Collaboration Impact the Adjuvant Treatment of Stage III Colon Cancer  
Irene Yu et al.

**Supplemental Table S1: Survey Responders' Recommended Adjuvant Therapy Pre- and Post-IDEA Collaboration: CAPOX versus FOLFOX**

|                      |                                | Pre-IDEA Collaboration |              | Post-IDEA Collaboration |             | OR for CAPOX Selection (95% CI) | P value |
|----------------------|--------------------------------|------------------------|--------------|-------------------------|-------------|---------------------------------|---------|
|                      |                                | CAPOX                  | FOLFOX       | CAPOX                   | FOLFOX      |                                 |         |
| Overall Responses    |                                | N=28 (19.3)            | N=117 (80.7) | N=79 (54.5)             | N=66 (45.5) | 5.0 (3.0-8.5)                   | <0.01   |
| Geography            | U.S., Canada                   | 9 (22.5)               | 31 (77.5)    | 22 (55.0)               | 18 (45.0)   | 4.2 (1.6-11.1)                  | <0.01   |
|                      | Europe, Australia, New Zealand | 7 (38.9)               | 11 (61.1)    | 16 (88.9)               | 2 (11.1)    | 12.6 (2.2-72.3)                 | <0.01   |
|                      | South America                  | 6 (7.8)                | 71 (92.2)    | 34 (44.2)               | 43 (55.8)   | 9.4 (3.6-24.1)                  | <0.01   |
|                      | Asia                           | 6 (60.0)               | 4 (40.0)     | 7 (70.0)                | 3 (30.0)    | 1.6 (0.2-10.0)                  | n/a     |
| Gender               | Male                           | 16 (18.0)              | 73 (82.0)    | 44 (49.4)               | 45 (50.6)   | 4.5 (2.3-8.8)                   | <0.01   |
|                      | Female                         | 11 (20.8)              | 42 (79.2)    | 34 (64.2)               | 19 (35.8)   | 6.8 (2.9-16.3)                  | <0.01   |
|                      | N/A                            | 1 (33.3)               | 2 (66.7)     | 1 (33.3)                | 2 (66.7)    | 1.0 (0.0-30.0)                  | n/a     |
| Practice Setting     | Academic                       | 15 (29.4)              | 36 (70.6)    | 30 (58.8)               | 21 (41.2)   | 3.4 (1.5-7.8)                   | <0.01   |
|                      | Community                      | 6 (14.0)               | 37 (86.0)    | 21 (48.8)               | 22 (51.2)   | 5.9 (2.1-16.8)                  | <0.01   |
|                      | Both                           | 7 (13.7)               | 44 (86.3)    | 28 (54.9)               | 23 (45.1)   | 7.7 (2.9-20.2)                  | <0.01   |
| Duration of Practice | Less than 10 years             | 14 (23.0)              | 47 (77.0)    | 35 (57.4)               | 26 (42.6)   | 4.5 (2.1-9.9)                   | <0.01   |
|                      | More than 10 years             | 14 (16.7)              | 70 (83.3)    | 44 (52.4)               | 40 (47.6)   | 5.5 (2.7-11.3)                  | <0.01   |
